# Supplementary material for: The Neglected Angio-Neurotrophic Parasite Gurltia paralysans (Nematoda: Angiostrongylidae): Northernmost South American Distribution, Current Knowledge, and Future Perspectives
Source: MDPI journal article supplement (doi:10.3390/pathogens10121601), 2021-12-09
Supplement: s1 [file s1]

**Table S1.** Gastropod species as potential intermediate hosts for *G. paralysans* in Colombia.

| <b>Taxon</b>                    | <b>Habitats<sup>1</sup></b> | <b>Distribution<sup>2</sup></b> |
|---------------------------------|-----------------------------|---------------------------------|
| <b>Neritidae</b>                |                             |                                 |
| <i>Neritina laetissima</i>      | B, F                        | P                               |
| <i>Neritina punctulata</i>      | B, F                        | C                               |
| <i>Neritina virginea</i>        | B, F                        | C                               |
| <b>Ampullariidae</b>            |                             |                                 |
| <i>Asolene crassa</i>           | F                           | C, M-C                          |
| <i>Marisa cornuarietis</i>      | F                           | A, C, M-C, O                    |
| <i>Pomacea bridgesii</i>        | F                           | A                               |
| <i>Pomacea canaliculata</i>     | F                           | A                               |
| <i>Pomacea dolioides</i>        | F                           | O                               |
| <i>Pomacea flagellata</i>       | F                           | C, M-C                          |
| <i>Pomacea glauca</i>           | F                           | C, M-C                          |
| <i>Pomacea haustorium</i>       | F                           | M-C                             |
| <i>Pomacea maculata</i>         | F                           | A, O                            |
| <i>Pomacea oblonga</i>          | F                           | M-C, O                          |
| <i>Pomacea palmeri</i>          | F                           | M-C                             |
| <i>Pomacea papyracea</i>        | F                           | A, O                            |
| <i>Pomacea superba</i>          | F                           | C, M-C                          |
| <i>Pomacea urceus</i>           | F                           | A, O                            |
| <b>Thiaridae</b>                |                             |                                 |
| <i>Aylacostoma</i> sp.          | F                           | O                               |
| <i>Melanoides tuberculata</i>   | F                           | C, M-C, O                       |
| <i>Tarebia granifera</i>        | F                           | C, M-C                          |
| <b>Cochliopidae</b>             |                             |                                 |
| <i>Andesipyrargus sketi</i>     | F/Tg                        | M-C                             |
| <i>Aroapyrgus colombiensis</i>  | F                           | M-C                             |
| <i>Lithococcus venustus</i>     | F                           | P                               |
| <i>Pyrgophorus parvulus</i>     | F                           | C, M-C                          |
| <b>Lymnaeidae</b>               |                             |                                 |
| <i>Pseudosuccinea columella</i> | F                           | C, M-C, O                       |
| <i>Galba cousini</i>            | F                           | M-C, O, P                       |
| <i>Galba truncatula</i>         | F                           | M-C                             |
| <b>Physidae</b>                 |                             |                                 |
| <i>Physa acuta</i>              | F                           | C, M-C                          |
| <i>Stenophysa marmorata</i>     | F                           | C, M-C, O                       |
| <b>Planorbidae</b>              |                             |                                 |
| <i>Biomphalaria amazonica</i>   | F                           | A                               |
| <i>Biomphalaria edisoni</i>     | F                           | M-C                             |
| <i>Biomphalaria kuhniana</i>    | F                           | M-C, O                          |
| <i>Biomphalaria pallida</i>     | F                           | C                               |
| <i>Biomphalaria peregrina</i>   | F                           | M-C, O                          |
| <i>Biomphalaria straminea</i>   | F                           | M-C, O                          |
| <i>Drepanotrema anatinum</i>    | F                           | M-C, O                          |
| <i>Drepanotrema cimex</i>       | F                           | M-C                             |

|                                |   |              |
|--------------------------------|---|--------------|
| <i>Drepanotrema</i>            | F | M-C          |
| <i>depresissimum</i>           |   |              |
| <i>Ferrisia irrorata</i>       | F | M-C          |
| <i>Gundlachia radiata</i>      | F | C, M-C       |
| <i>Planorbella duryi</i>       | F | M-C          |
| <i>Uncancylus concentricus</i> | F | C, M-C       |
| <b>Cyclophoriidae</b>          |   |              |
| <i>Filocyclus delphinulus</i>  | T | ¿CO?         |
| <i>Calacyclotus atratensis</i> | T | ¿CO?         |
| <b>Megalomastomidae</b>        |   |              |
| <i>Aperostoma</i> sp.          | T | M-C, C       |
| <b>Neocyclotidae</b>           |   |              |
| <i>Daronia</i> sp.             | T | M-C          |
| <i>Calaperostoma</i>           | T | P            |
| <i>Poteria</i> sp.             | T | M-C, C       |
| <i>Neocyclotus</i> sp.         | T | ¿CO?         |
| <b>Achatinidae</b>             |   |              |
| <i>Achatina</i> sp.            | T | ¿CO?         |
| <i>Rhodea</i> sp.              | T | M-C          |
| <i>Subulina</i> sp.            | T | M-C, C, O, P |
| <i>Synapterpes</i> sp.         | T | M-C, P       |
| <b>Agriolimacidae</b>          |   |              |
| <i>Deroceras</i> sp.           | T | M-C, P       |
| <b>Arionidae</b>               |   |              |
| <i>Arion</i> sp.               |   | M-C          |
| <b>Boettgerillidae</b>         |   |              |
| <i>Boettgerilla compressa</i>  | T | A, M-C       |
| <i>Boettgerilla pallens</i>    | T | M-C          |
| <b>Bulimulidae</b>             |   |              |
| <i>Auris</i> sp.               | T | O            |
| <i>Bulimulus</i> sp.           | T | M-C, C       |
| <i>Drymaeus</i> sp.            | T | A, M-C, C    |
| <i>Naesiotus</i> sp.           | T | M-C, P       |
| <b>Simpulopsidae</b>           |   |              |
| <i>Simpulopsis</i> sp.         | T |              |
| <b>Amphibulimidae</b>          |   |              |
| <i>Dryptus</i> sp.             | T | M-C, C       |
| <i>Plekocheilus</i> sp.        | T | O, M-C, C    |
| <i>Stenostylus</i> sp.         | T | ¿CO?         |
| <b>Megaspiridae</b>            |   |              |
| <i>Thaumastus</i> sp.          | T | P¿CO?        |
| <b>Orthalicidae</b>            |   |              |
| <i>Corona</i> sp.              | T | A            |
| <i>Hemibulimus dennisoni</i>   | T | M-C          |
| <i>Hemibulimus excisus</i>     | T | M-C          |
| <i>Orthalicus</i> sp.          | t | M-C, C       |
| <i>Porphyrobaphe</i> sp.       | T | P            |

|                            |   |              |
|----------------------------|---|--------------|
| <i>Sultana</i> sp.         | T | M-C          |
| <b>Labyrinthidae</b>       |   |              |
| <i>Isomeria</i> sp.        | T | M-C          |
| <i>Labyrinthus</i> sp.     | T | A, M-C, C, P |
| <b>Pleurodontidae</b>      |   |              |
| <i>Pleurodonte</i> sp.     | T | P            |
| <b>Solaropsidae</b>        |   |              |
| <i>Solaropsis</i> sp.      | T | M-C, O       |
| <b>Cerioniidae</b>         |   |              |
| <i>Cerion</i> sp.          | T | C            |
| <b>Charopidae</b>          |   |              |
| <i>Radiodiscus</i> sp.     | T | M-C          |
| <b>Clausiliidae</b>        |   |              |
| <i>Clausilia</i> sp.       | T | M-C          |
| <i>Columbinia</i> sp.      | T | P            |
| <i>Nenia</i> sp.           | T | M-C, C       |
| <b>Euconuliidae</b>        |   |              |
| <i>Habroconus</i> sp.      | T | P            |
| <b>Ferrussaciidae</b>      |   |              |
| <i>Cecilioides</i> sp.     | T | C, O         |
| <b>Helicidae</b>           |   |              |
| <i>Helix</i> sp.           | T | M-C          |
| <b>Epiphragmophoridae</b>  |   |              |
| <i>Epiphragmophora</i> sp. |   |              |
| <b>Limacidae</b>           |   |              |
| <i>Lehmmania</i> sp.       | T | M-C          |
| <i>Limax</i> sp.           | T | M-C          |
| <b>Strophocheilidae</b>    |   |              |
| <i>Megalobulimus</i> sp.   | T | C            |
| <b>Urocoptidae</b>         |   |              |
| <i>Microceramus</i> sp.    | T | C, O         |
| <b>Milacidae</b>           |   |              |
| <i>Milax</i> sp.           | T | M-C          |
| <b>Phylomicidae</b>        |   |              |
| <i>Philomycus</i> sp.      | T | ¿CO?         |
| <b>Polygyridae</b>         |   |              |
| <i>Giffordius</i> sp.      | T | M-C, C, O    |
| <b>Punctidae</b>           |   |              |
| <i>Paralaoma</i> sp.       | T | M-C          |
| <b>Pupillidae</b>          |   |              |
| <i>Pupoides</i> sp.        | T | C            |
| <b>Sagdidae</b>            |   |              |
| <i>Lacteoluna</i> sp.      | T | C, O         |
| <b>Scolodontidae</b>       |   |              |
| <i>Hirtudiscus</i> sp.     | T | M-C          |
| <b>Spiraxidae</b>          |   |              |
| <i>Euglandina</i> sp.      | T | M-C, C, P    |

|                           |   |                 |
|---------------------------|---|-----------------|
| <i>Pseudosubulina</i> sp. | T | ¿CO?            |
| <b>Streptaxidae</b>       |   |                 |
| <i>Streptaxis</i> sp.     | T | M-C, C, O       |
| <i>Streptostele</i> sp.   | T | M-C             |
| <b>Strobilopsidae</b>     |   |                 |
| <i>Strobilops</i> sp.     | T | C               |
| <b>Strophocheilidae</b>   |   |                 |
| <i>Strophocheilus</i> sp. | T | M-C, C, O       |
| <b>Subulinidae</b>        |   |                 |
| <i>Leptinaria</i> sp.     | T | C               |
| <b>Pyramidellidae</b>     |   |                 |
| <i>Pyramidella</i> sp.    | T | M-C             |
| <b>Opeatinae</b>          |   |                 |
| <i>Opeas</i> sp.          | T | C, O            |
| <b>Succineidae</b>        |   |                 |
| <i>Omalyonx</i> sp.       | T | A               |
| <i>Succinea</i> sp.       | T | M-C, C, O       |
| <b>Scolodontidae</b>      |   |                 |
| <i>Guestieria</i> sp.     | T | M-C             |
| <i>Happia</i> sp.         | T | M-C             |
| <i>Miradiscops</i> sp.    | T | C, O            |
| <i>Systrophia</i> sp.     | T | M-C, A, C, O, P |
| <b>Thysanophoridae</b>    |   |                 |
| <i>Thysanophora</i> sp.   | T | C, O            |
| <b>Valloniidae</b>        |   |                 |
| <i>Vallonia</i> sp.       | T | C               |
| <b>Pristilomatidae</b>    |   |                 |
| <i>Hawaia</i> sp.         | T | M-C             |
| <i>Vitrea</i> sp.         | T | M-C             |
| <b>Gastrocoptidae</b>     |   |                 |
| <i>Gastrocopta</i> sp.    | T | C               |
| <b>Valloniidae</b>        |   |                 |
| <i>Pupisoma</i> sp.       | T | C               |
| <b>Vertiginidae</b>       |   |                 |
| <i>Vertigo</i> sp.        | T | C, O            |
| <b>Xanthonychidae</b>     |   |                 |
| <i>Leptarionta</i> sp.    | T | ¿CO?            |
| <b>Oxychilidae</b>        |   |                 |
| <i>Oxychilus</i> sp.      | T | M-C             |

<sup>1</sup> Habitats: Fresh water (F), Brackish water (B), Terrestrial (T), Tg (Troglobio). <sup>2</sup> Watershed distribution: A (Amazonian), C (Caribbean), M-C (Magdalena-Cauca), O (Orinoquian), P (Pacific).
